# Supplementary material for: Petroleomics via Orbitrap mass spectrometry with resolving power above 1 000 000 at m/z 200
Source: Royal Society of Chemistry journal article supplement (doi:10.1039/c7ra12509g), 2018-01-01
Supplement: c7ra12509g1.pdf [file c7ra12509g1.pdf]

## Supporting Information

**Title:** Petroleomics via Orbitrap mass spectrometry with resolving power above 1,000,000

**Authors:** *Eduardo M. Schmidt<sup>†, ‡</sup>, Marcos A. Pudenzi<sup>†</sup>, Jandyson M. Santos<sup>†</sup>, Celio F. F. Angolini<sup>†</sup>, Rosana C. L. Pereira<sup>£</sup>, Ygor Rocha<sup>£</sup>, Eduard Denisov<sup>¥</sup>, Eugen Damoc<sup>¥</sup>, Alexander Makarov<sup>¥\*</sup>, Marcos N. Eberlin<sup>\*†</sup>*

<sup>†</sup> ThoMSon Mass Spectrometry Laboratory, Institute of Chemistry, University of Campinas, UNICAMP, 13083-725, Campinas, SP, Brazil

<sup>‡</sup> Nova Analítica Importações e Exportações LTDA, 04131-000, São Paulo, SP, Brazil.

<sup>£</sup> Petróleo Brasileiro S/A, PETROBRAS, CENPES, 21941-915, Rio de Janeiro, RJ, Brazil

<sup>¥</sup> Thermo Fisher Scientific, Hanna-Kunath-Strasse 11, 28199, Bremen, Germany.

**Corresponding Authors:** \*eberlin@iqm.unicamp.br (M.N.E);

alexander.makarov@thermofisher.com (A.M).

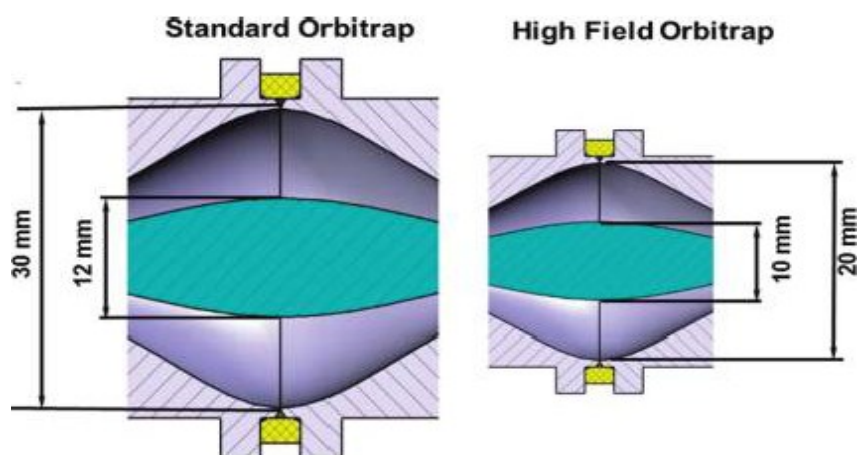

**Figure S1:** The standard Orbitrap geometry (left) and that of a compact high-field Orbitrap (right) analyzer. The outer electrodes are separated by a quartz ring and used for detection and therefore are maintained at the virtual ground of the preamplifier, whereas the central electrode is used for trapping at a voltage  $-U_r$  ( $U_r > 0$  for positive ions). Courtesy of © Thermo Fisher Scientific (Bremen) GmbH.

**Table S1:** Molecular formula assigned to ions detected and separated by the standard Orbitrap, the 7.2 T FT-ICR and the MegaOrbitrap analyzers in the  $m/z$  504.26 – 504.46 range.

| Molecular Formula   | Theoretical Mass | Mass Analyzer | Experimental Mass | Absolute intensity | Error (ppm) | Resolving Power |
|---------------------|------------------|---------------|-------------------|--------------------|-------------|-----------------|
| $C_{38}H_{34}N$     | 504.26858        | Std. Orbitrap | X                 | X                  | X           | X               |
|                     |                  | FT-ICR        | 504.26790         | 2346.4             | -1.342      | 252,100         |
|                     |                  | MegaOrbitrap  | X                 | X                  | X           | X               |
| $C_{36}H_{42}NO$    | 504.32609        | Std. Orbitrap | 504.32721         | 4294               | 2.218       | 73,900          |
|                     |                  | FT-ICR        | 504.32558         | 4342.7             | -1.014      | 234,700         |
|                     |                  | MegaOrbitrap  | 504.32635         | 15873.7            | 0.513       | 665,004         |
| $C_{33}H_{46}NOS$   | 504.32946        | Std. Orbitrap | X                 | X                  | X           | X               |
|                     |                  | FT-ICR        | X                 | X                  | X           | X               |
|                     |                  | MegaOrbitrap  | 504.32986         | 2961.1             | 0.797       | 630,456         |
| $C_{27}H_{54}NOS_3$ | 504.33620        | Std. Orbitrap | X                 | X                  | X           | X               |
|                     |                  | FT-ICR        | X                 | X                  | X           | X               |
|                     |                  | MegaOrbitrap  | 504.33557         | 9152.9             | -1.257      | 621,404         |
| $C_{31}H_{52}OS_2$  | 504.34541        | Std. Orbitrap | 504.34509         | 2205.9             | -0.633      | 75,000          |
|                     |                  | FT-ICR        | 504.34489         | 2260.7             | -1.029      | 248,400         |
|                     |                  | MegaOrbitrap  | X                 | X                  | X           | X               |
| $C_{37}H_{46}N$     | 504.36248        | Std. Orbitrap | 504.36185         | 33785              | -1.243      | 91,502          |
|                     |                  | FT-ICR        | 504.36186         | 61057.8            | -1.223      | 266,600         |
|                     |                  | MegaOrbitrap  | 504.36279         | 106921.5           | 0.621       | 634,604         |
| $C_{34}H_{50}NS$    | 504.36585        | Std. Orbitrap | X                 | X                  | X           | X               |
|                     |                  | FT-ICR        | 504.36503         | 5488.8             | -1.621      | 273,600         |
|                     |                  | MegaOrbitrap  | 504.36603         | 14255.1            | 0.361       | 664,404         |

|                      |           |               |           |          |        |         |
|----------------------|-----------|---------------|-----------|----------|--------|---------|
| $C_{34}H_{50}NO_2$   | 504.38361 | Std. Orbitrap | 504.38235 | 5622.7   | -2.491 | 86,602  |
|                      |           | FT-ICR        | 504.38284 | 2683     | -1.519 | 220,900 |
|                      |           | MegaOrbitrap  | 504.38394 | 21729.2  | 0.662  | 668,904 |
| $C_{35}H_{54}NO$     | 504.41999 | Std. Orbitrap | 504.41995 | 4192.1   | -0.083 | 77,400  |
|                      |           | FT-ICR        | 504.41939 | 3695.9   | -1.193 | 229,100 |
|                      |           | MegaOrbitrap  | 504.42035 | 13535.1  | 0.710  | 692,604 |
| $C_{31}H_{56}N_2O_3$ | 504.42855 | Std. Orbitrap | X         | X        | X      | X       |
|                      |           | FT-ICR        | X         | X        | X      | X       |
|                      |           | MegaOrbitrap  | 504.42947 | 10397.3  | 1.834  | 654,904 |
| $C_{30}H_{64}OS_2$   | 504.43931 | Std. Orbitrap | X         | X        | X      | X       |
|                      |           | FT-ICR        | 504.43856 | 1063.5   | -1.486 | 284,300 |
|                      |           | MegaOrbitrap  | 504.43976 | 7245.1   | 0.893  | 670,604 |
| $C_{32}H_{60}N_2S$   | 504.44717 | Std. Orbitrap | X         | X        | X      | X       |
|                      |           | FT-ICR        | 504.44688 | 12948.9  | -0.579 | 251,500 |
|                      |           | MegaOrbitrap  | 504.44775 | 28837.3  | 1.146  | 665,604 |
| $C_{36}H_{58}N$      | 504.45637 | Std. Orbitrap | 504.45572 | 172385.9 | -1.303 | 96,506  |
|                      |           | FT-ICR        | 504.45573 | 199385.4 | -1.283 | 268,401 |
|                      |           | MegaOrbitrap  | 504.45670 | 479846.7 | 0.640  | 695,501 |

X= Not detected in this condition

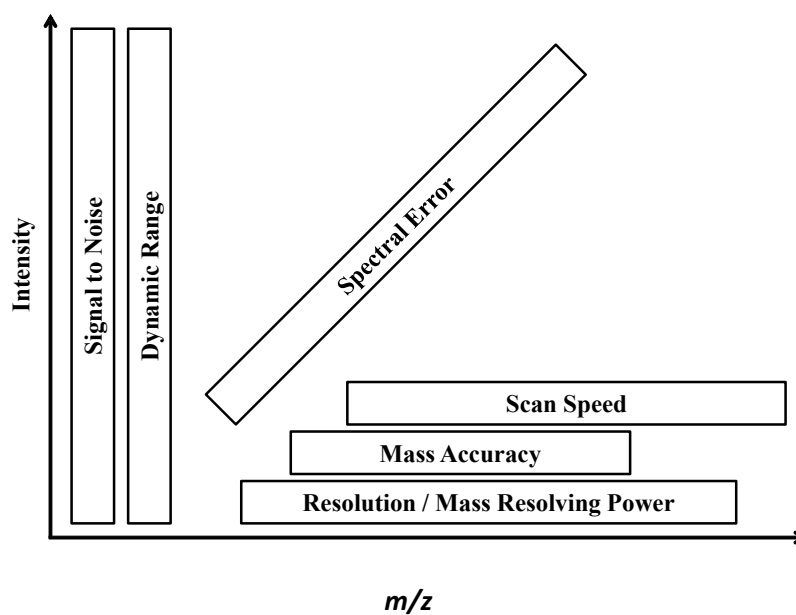

**Figure S2:** Major figures of merit used in mass spectrometry and their correlation with  $m/z$  values and peak intensity.

**Signal to Noise \***

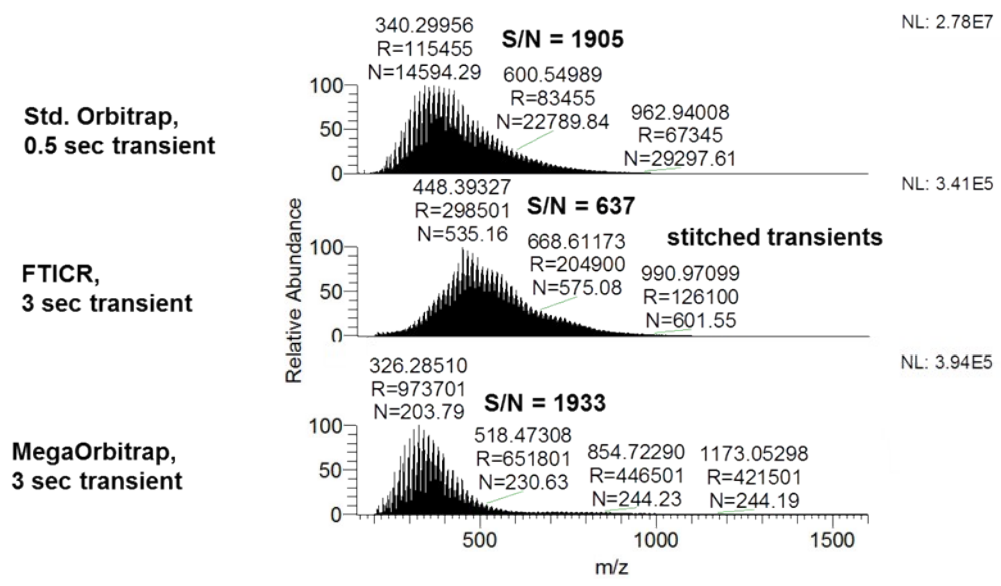

**Figure S3\*:** Signal-to-Noise ratio obtained from the analysis of a typical crude oil sample in Standard Orbitrap, FT-ICR, and MegaOrbitrap.

**Dynamic Range**

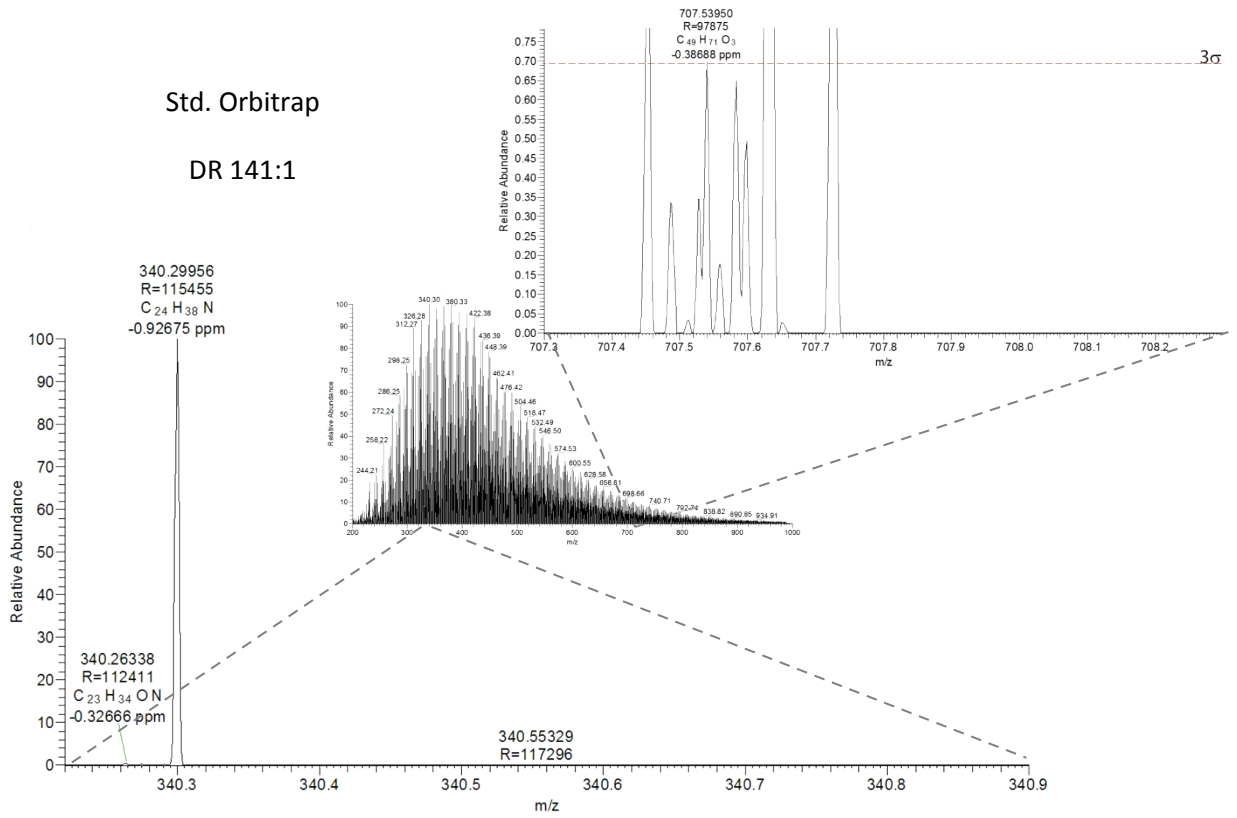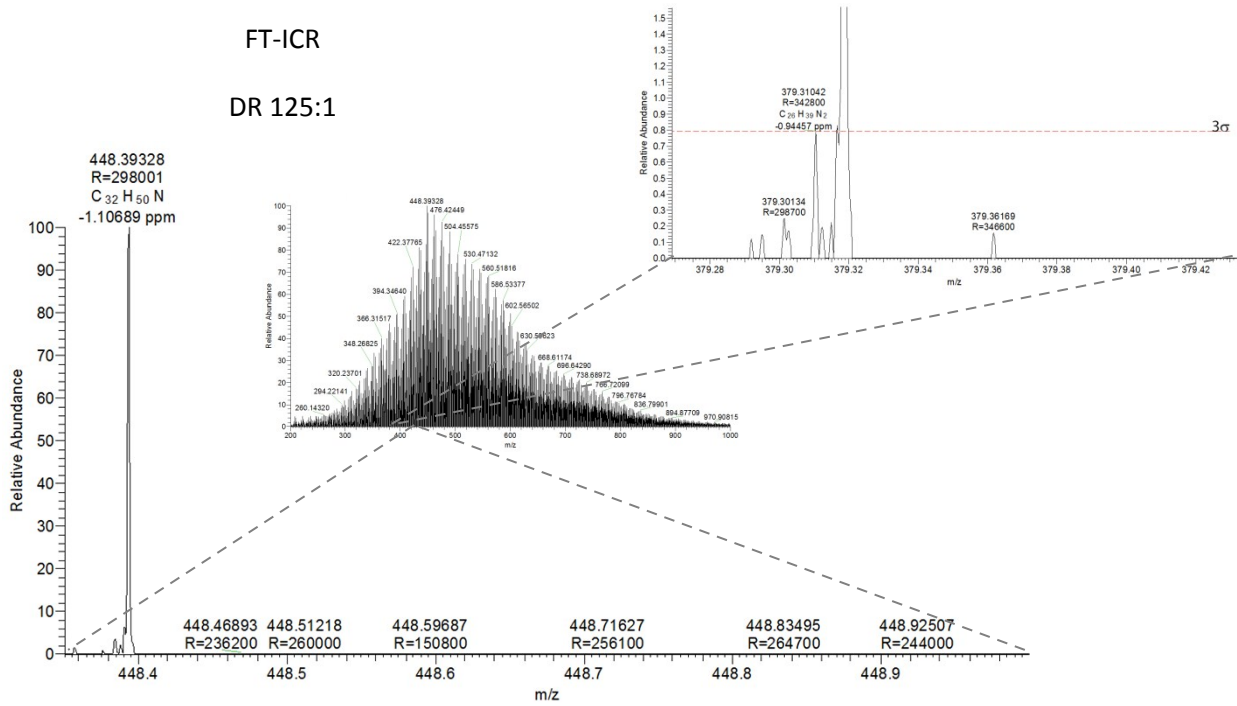

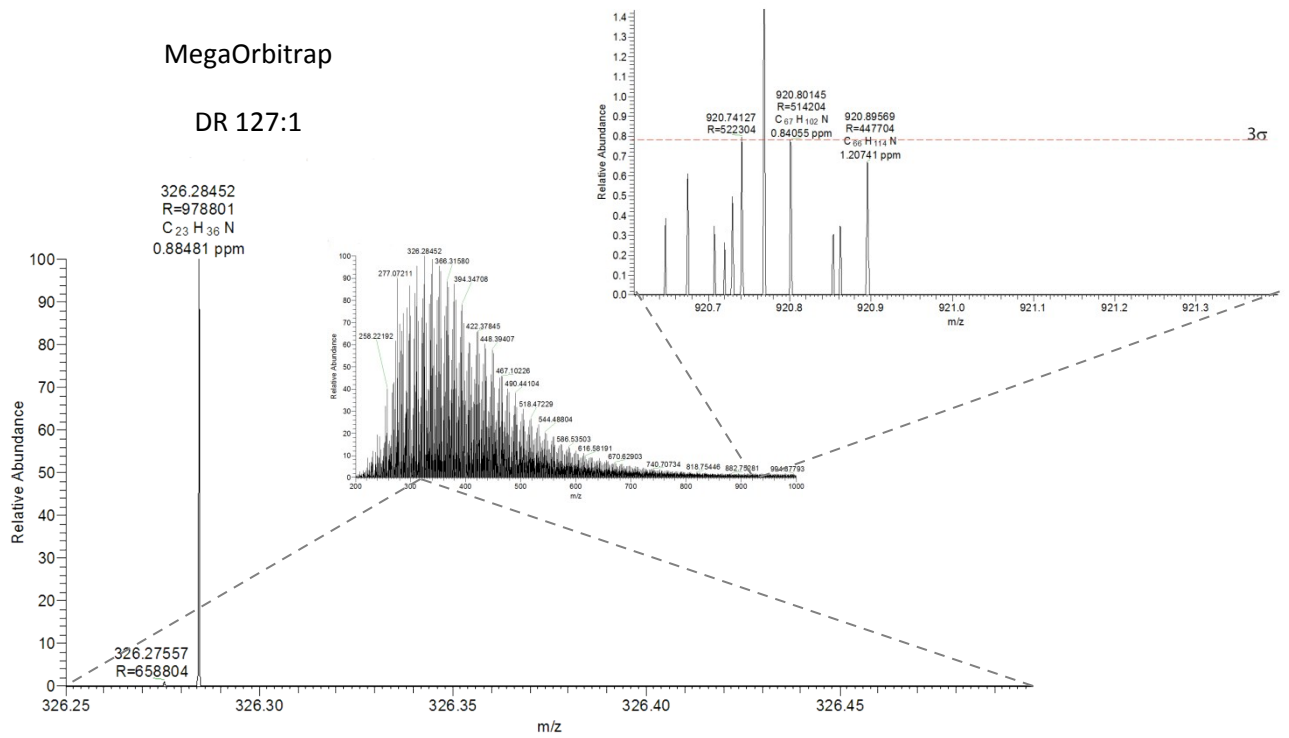

**Figure S4\*:** Calculated Dynamic Range in the analysis of a typical crude oil sample in Standard Orbitrap, FT-ICR and MegaOrbitrap.

## Spectral Error

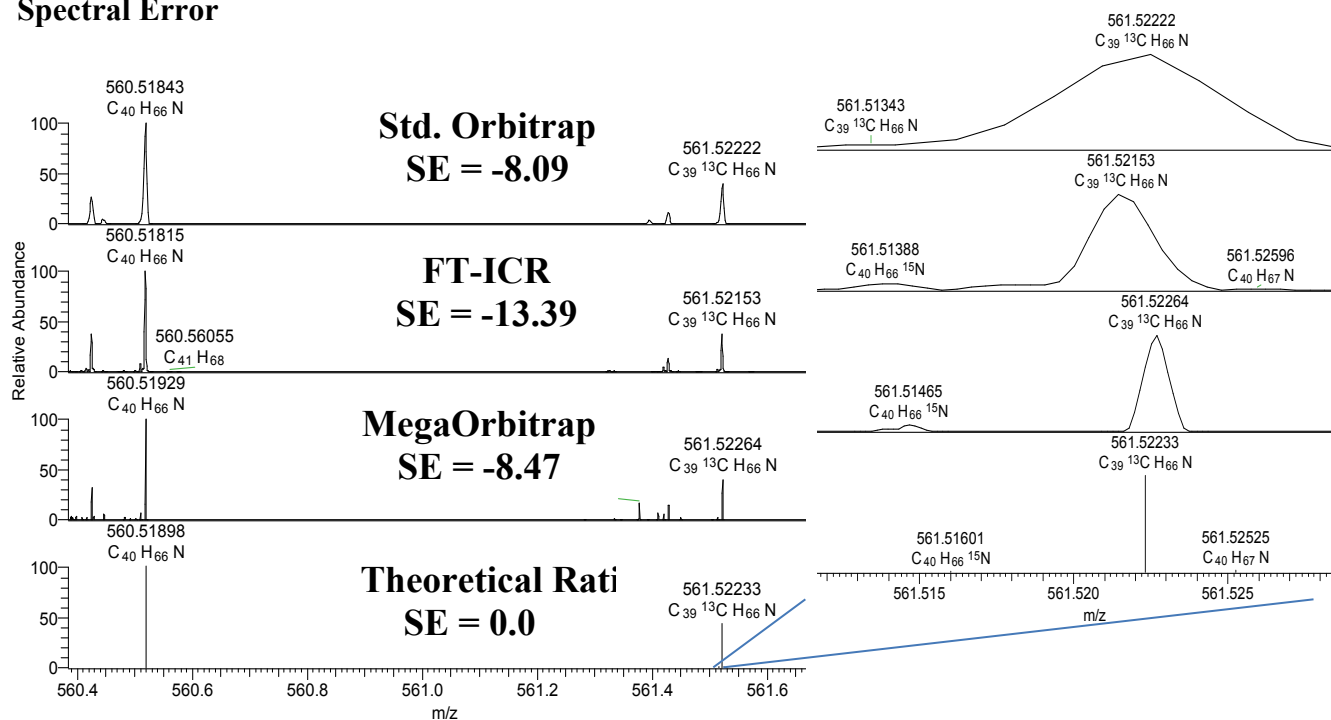

**Figure S5\*:** Spectral Error (SE) for  $C_{40}H_{66}N$  and its isotope  $C_{39}^{13}CH_{66}N$  obtained from the analysis of a typical crude oil sample by Standard Orbitrap, FT-ICR, and MegaOrbitrap.

**Table S2\*:** Mean spectral error (SE) for all molecular formula assigned obtained from the analysis of a typical crude oil sample by using the Standard Orbitrap, FT-ICR, and MegaOrbitrap. The total number of molecular formulas and attributed isotopologues is also shown.

| <i>Mass Analyzer</i> | Mean spectral error (SE) (%) |         |         | Molecular formula (attributed isotopologues) |
|----------------------|------------------------------|---------|---------|----------------------------------------------|
|                      | M+1                          | M+2     | Total   |                                              |
| Standard Orbitrap    | 12 ± 10                      | 29 ± 8  | 13 ± 10 | 537 (512)                                    |
| FT-ICR               | 14 ± 10                      | 18 ± 10 | 15 ± 10 | 2376 (1661)                                  |
| MegaOrbitrap         | 14 ± 11                      | 16 ± 11 | 15 ± 11 | 1754 (1320)                                  |

## Scan Speed

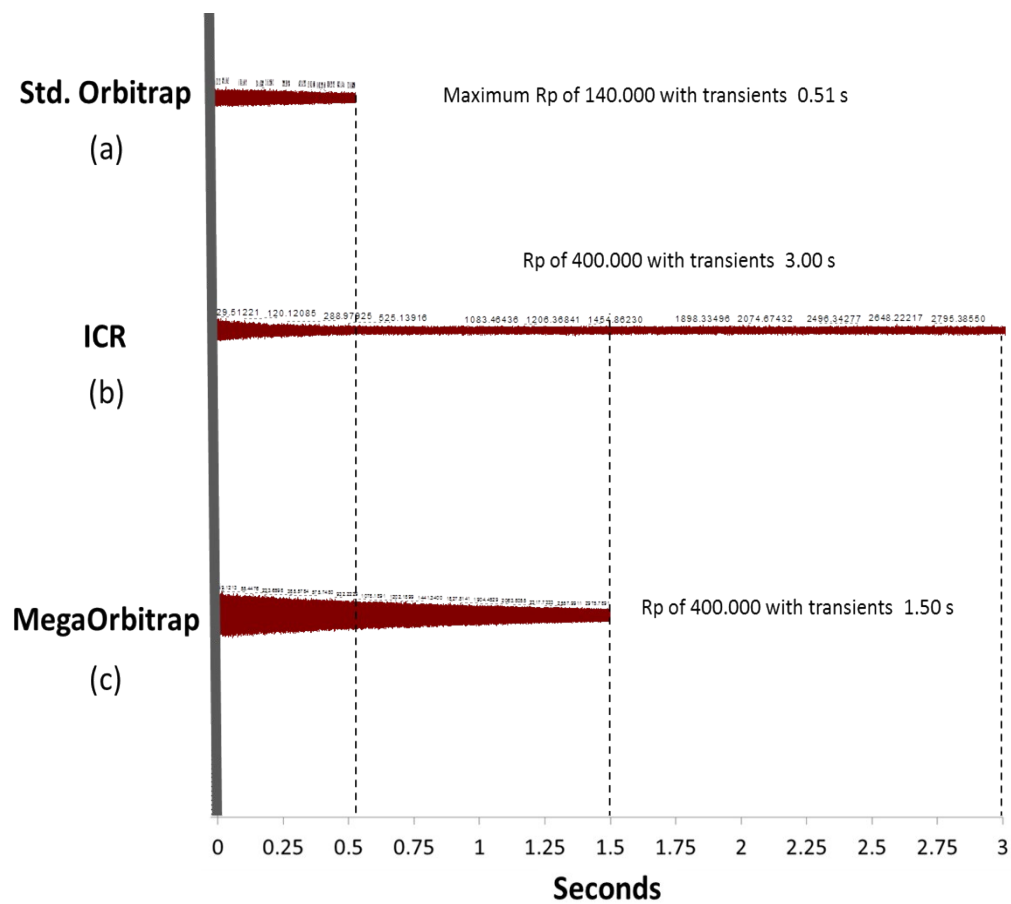

**Figure S6\*:** Transients obtained for each equipment organized in the same time scale in seconds. They refer to (a) Standard Orbitrap (b) FT-ICR and (c) MegaOrbitrap



## Mass Accuracy

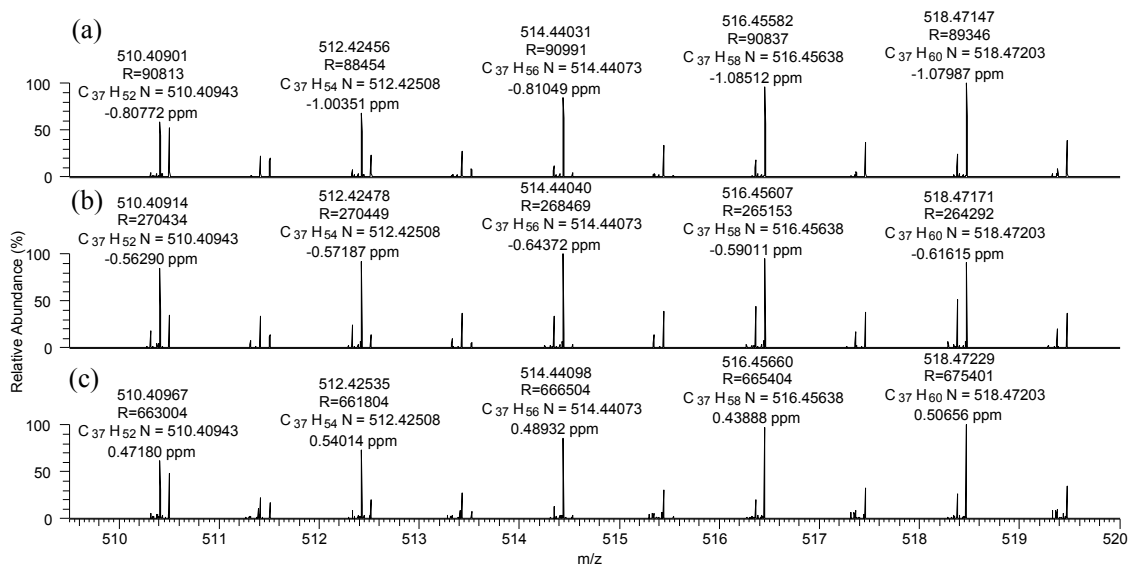

**Figure S7\*:** Spectra in the same mass range showing the differences in mass accuracy and resolution between the equipments studied: (a) Standard Orbitrap (b) FT-ICR and (c) MegaOrbitrap

**Table S3\*:** Minimum resolving power required for resolve compounds differing by  $C_3$  and  $SH_4$  at different  $m/z$

| $m/z$ | Minimum Resolving Power |
|-------|-------------------------|
| 200   | 117647                  |
| 400   | 235294                  |
| 600   | 352941                  |
| 800   | 470588                  |
